# Supplementary material for: Future Changes in Human-Biometeorological Index Classes in Three Regions of Luxembourg, Western-Central Europe
Source: Hindawi journal article supplement (doi:10.1155/2015/323856), 2015-01-01

### Future changes in human-biometeorological index classes in three regions of Luxembourg, Western-Central Europe

Hanna Leona Lokys <sup>a,b,\*</sup>, Jürgen Junk <sup>a</sup>, Andreas Krein <sup>a</sup>

<sup>a</sup> Luxembourg Institute of Science and Technology (LIST), ERIN - Environmental Research & Innovation Department, 41 rue du Brill, L-4422 Belvaux, Luxembourg

<sup>b</sup> University of Münster, Climatology Working Group, Heisenbergstraße 2, D-48149 Münster, Germany

\* Corresponding author: +352 470261446, hanna.lokys@list.lu

**Supplement figure 1:** Average length of “cold stress” (a), “no thermal stress” (b) and “heat stress” (c) periods at the three pseudo stations compared to the reference period in percent. Values above 100% indicate an increase, while values below 100% indicate a decrease.

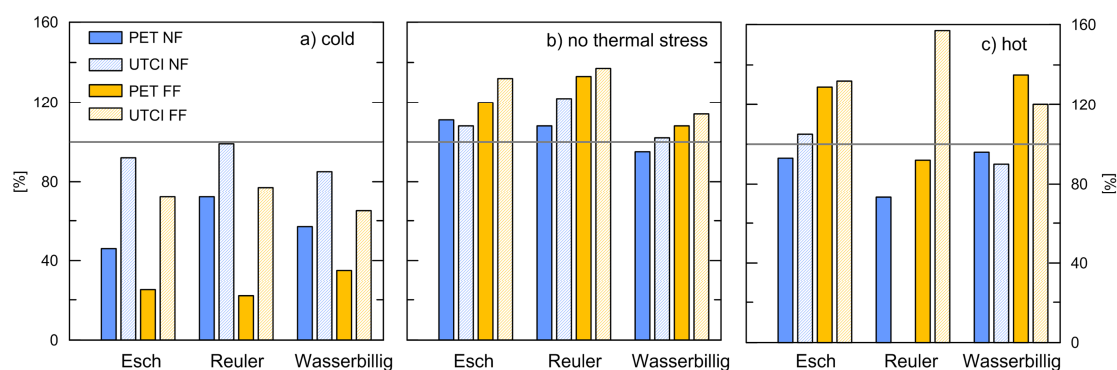

Supplement: f1 [file 323856.f1.pdf]
